# Supplementary material for: Secondary or Specialized Metabolites, or Natural Products: A Case Study of Untargeted LC–QTOF Auto-MS/MS Analysis
Source: MDPI journal article supplement (doi:10.3390/cells11061025), 2022-03-17
Supplement: s1 [file s1]

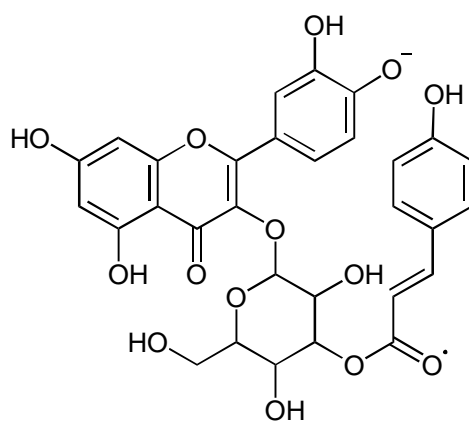

Chemical Formula:  $C_{30}H_{25}O_{14}^{\bullet-}$   
Exact Mass: 609.1250

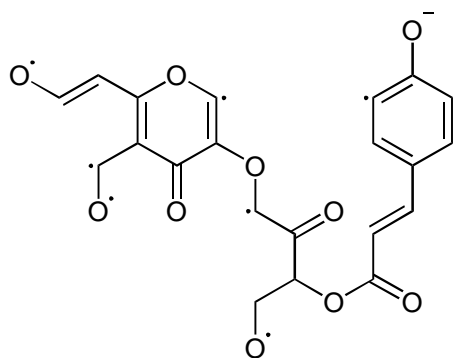

Chemical Formula:  $C_{21}H_{11}O_{10}^{8*-}$   
Exact Mass: 423.0358

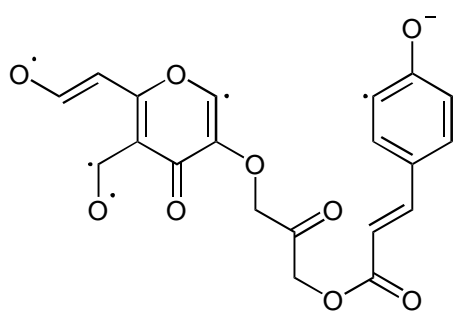

Chemical Formula:  $C_{20}H_{11}O_9^{6*-}$   
Exact Mass: 395.0409

**Figure S1.** In-source and MS/MS fragmentation of quercetin-3-(3''-p-coumaroyl)-glu-rha (9.11 min)
